## **Naturally acquired Rift Valley fever virus neutralizing antibodies predominantly target the Gn glycoprotein**

Daniel Wright<sup>a,b</sup>, Elizabeth R. Allen<sup>c</sup>, Madeleine H.A. Clark<sup>d</sup>, John N. Gitonga<sup>a</sup>, Henry K. Karanja<sup>a</sup>, Ruben Hulswit<sup>c</sup>, Iona Taylor<sup>b</sup>, Sumi Biswas<sup>b</sup>, Jennifer Marshall<sup>b</sup>, Damaris Mwololo<sup>e</sup>, John Muriuki<sup>e</sup>, Bernard Bett<sup>e</sup>, Thomas A. Bowden<sup>c</sup>, George M. Warimwe<sup>a,f</sup>

<sup>a</sup>KEMRI-Wellcome Trust Research Programme, Kenya, <sup>b</sup>The Jenner Institute, University of Oxford, UK, <sup>c</sup>Wellcome Centre for Human Genetics, Division of Structural Biology, University of Oxford, UK, <sup>d</sup>London School of Hygiene & Tropical Medicine, UK, <sup>e</sup>International Livestock Research Institute, Kenya, <sup>f</sup>Centre for Tropical Medicine and Global Health, University of Oxford, UK

### **ABSTRACT**

1 Rift Valley fever (RVF) is a viral haemorrhagic disease first discovered in Kenya in 1930.  
2 Numerous animal studies have demonstrated that protective immunity is acquired following  
3 RVF virus (RVFV) infection, and that this correlates with acquisition of virus neutralizing  
4 antibodies (nAb) that target the viral envelope glycoproteins. However, naturally acquired  
5 immunity to RVF in humans is poorly described. Here, we characterized the immune response  
6 to the viral envelope glycoproteins, Gn and Gc, in RVFV-exposed Kenyan adults. Long-lived  
7 IgG (dominated by IgG1 subclass) and T cell responses were detected against both Gn and  
8 Gc. However, antigen-specific antibody depletion experiments showed that Gn-specific  
9 antibodies dominate the RVFV nAb response. IgG avidity against Gn, but not Gc, correlated  
10 with nAb titers. These data are consistent with the greater level of immune accessibility of Gn  
11 on the viral envelope surface and confirm the importance of Gn as an integral component for  
12 RVF vaccine development.

13 **NOTE: This preprint reports new research that has not been certified by peer review and should not be used to guide clinical practice.**

## 14 INTRODUCTION

15 Rift Valley fever (RVF) is one of several epidemic diseases prioritised by the World Health  
16 Organization and other global organisations for urgent research and development of control  
17 interventions (Mehand et al., 2018, Gouglas et al., 2018). The disease was first described in  
18 Kenya in 1930 but RVF epidemics are now commonly reported in Africa and the Arabian  
19 Peninsula (CDC, 2020). RVF is caused by the mosquito-borne Rift Valley fever virus (RVFV),  
20 a single-stranded RNA *Phlebovirus* in the *Phenuviridae* family (ICTV, 2020). The virus  
21 primarily infects ruminants resulting in high rates of neonatal mortality and abortion, that  
22 translate to major economic losses in the livestock industry of affected countries. Zoonotic  
23 transmission to humans most commonly occurs during livestock epizootics through infectious  
24 mosquito bites or direct contact with tissue or fluid from infected animals (Daubney et al.,  
25 1931a, Nicholas et al., 2014). A wide spectrum of clinical manifestations characterize RVF in  
26 humans; including self-limiting mild illness associated with fever, myalgia and other non-  
27 specific symptoms, through to haemorrhagic and neurological manifestations with high case  
28 fatality and debilitating sequela, and miscarriage in pregnant women (reviewed in (Wright et  
29 al., 2019)). No therapeutics or vaccines are currently approved for human use, though several  
30 candidate vaccines are in development (Gouglas et al., 2018).

31

32 RVFV contains a tripartite genome consisting of a small (S), medium (M) and large (L)  
33 segment (Wright et al., 2019). The S segment encodes the nucleoprotein (N) and a non-  
34 structural protein (NSs). The L segment encodes the RNA-dependant RNA polymerase. The  
35 M segment encodes the structural glycoproteins, Gn and Gc. These two glycoproteins form  
36 heterodimers arranged into higher order pentamers and hexamers that encapsulate the  
37 mature virion and are responsible for host-cell attachment and membrane fusion (Halldorsson  
38 et al., 2018a, Freiberg et al., 2008, Sherman et al., 2009, Huiskonen et al., 2009). They are  
39 the prime targets of neutralizing antibodies. Through the use of alternative translation sites  
40 and post-translational cleavage, the M segment also encodes for a non-structural protein and

41 a 78kDa protein, which may play a structural role in virus-derived from mosquito cells  
42 (Weingartl et al., 2014).

43

44 Historical seminal studies in livestock and non-human primates demonstrated that immunity  
45 to RVF is acquired following recovery from RVFV infection, and that this can be passively  
46 transferred to susceptible animals through administration of convalescent sera (Peters et al.,  
47 1988, Daubney et al., 1931b). These studies identified viral neutralizing antibodies (nAb),  
48 which target the RVFV Gn and Gc envelope glycoproteins, as the main correlates of protection  
49 against RVF (Easterday, 1965). Occupational exposure to RVFV infection during the decades  
50 following the discovery of RVFV provided the first evidence of naturally acquired RVFV nAbs  
51 and these tended to be long-lived, being readily detectable in two individuals 12 and 25 years  
52 post-infection, respectively, despite no further exposure (Smithburn et al., 1949, Brown et al.,  
53 1957, Findlay, 1936). However, beyond these studies, naturally acquired immunity to RVFV  
54 in humans is poorly described. Here, we sought to address this paucity of information by  
55 characterizing the humoral and cellular response to RVFV among naturally exposed adults in  
56 Kenya, including an investigation of the longevity and kinetics of RVFV nAbs in this population.

57

## 58 **RESULTS**

59 Stored samples from two adult populations in coastal Kenya were used for this study (see  
60 Methods). One population of adults comprised a random selection of fifty RVFV-exposed  
61 individuals included in a previous cross-sectional survey investigating the risk factors for RVFV  
62 exposure in Tana River county (Bett et al., 2018). The second population was composed of  
63 adults under longitudinal surveillance for malaria within the KHDSS in Kilifi county and had  
64 previously not been screened for RVFV exposure (see Methods).

### 65 **IgG responses against Gn and Gc correlate with RVFV nAb levels**

66 We first measured IgG antibody responses against Gn and Gc in fifty RVFV-exposed adults  
67 from Tana River county and assessed their relationship with the RVFV nAb response. The  
68 geometric mean titer (GMT) of RVFV nAb as measured by virus neutralizing assay (VNT<sub>50</sub>) in  
69 these fifty adults was approximately 2100 (95% CI 1543, 2792), and ranged between ~160 to  
70 >14000 (**Fig. 1**). Total IgG titers against Gn and Gc (ELISA GMT of 67.3 for Gn and 66.9 for  
71 Gc) were highly correlated ( $r=0.77$ ,  $p<0.001$ ). A strong correlation was observed between the  
72 RVFV nAb titer and IgG response against Gn ( $r=0.76$ ,  $p<0.0001$ ) and Gc ( $r=0.68$ ,  $p<0.0001$ )  
73 (**Fig 1a**). IgG1 subclass predominated the antibody response against both Gn and Gc (**Fig.**  
74 **1c**).

75 We also measured the avidity of the antibody response to each glycoprotein, expressing this  
76 as the concentration of NaSCN, a chaotropic agent, required to reduce ELISA signal by 50%  
77 (NaSCN IC<sub>50</sub>). Anti-Gc antibody avidity was significantly higher than that for anti-Gn antibodies  
78 (**Fig. 1b**); however, a correlation between antibody avidity and nAb response was only  
79 observed for Gn ( $r=0.37$ ,  $p=0.009$ ) and not Gc ( $r=0.08$ ,  $p=0.57$ ).

#### 80 **nAbs from naturally exposed adults preferentially target RVFV Gn over Gc**

81 We next investigated the relative contribution of Gn and Gc to the RVFV nAb response. To do  
82 this, we pooled sera from 7 RVFV-exposed adults from Tana River county that had sufficient  
83 material available. We then depleted the pooled serum of antibodies specific for one or both  
84 of the recombinant RVFV glycoproteins (see Methods). ELISA was used to confirm the  
85 depletion, showing a reduction in IgG endpoint titer of 98% and 93% for Gn and Gc,  
86 respectively, compared to non-depleted serum (**Fig. 2a**). The impact of this antigen-specific  
87 antibody depletion on the ability of the pooled serum to neutralize RVFV *in vitro* was then  
88 measured by VNT<sub>50</sub>. Anti-Gn antibody depletion resulted in a 79% reduction in nAb titer  
89 compared to the non-depleted serum (**Fig. 2b**). In contrast, depletion of anti-Gc antibodies  
90 from sera showed a modest 29% reduction compared to the non-depleted serum (**Fig. 2b**).  
91 Depletion of both Gn and Gc antibodies showed a 79% reduction in nAb titer, identical to the  
92 pool depleted of anti-Gn antibodies alone (**Fig. 2b**).

93 Of 200 adults under longitudinal surveillance for malaria studies in Kilifi county, 6 (3%) in 2018  
94 had evidence of RVFV exposure on the basis of carriage of RVFV nAbs (see Methods). To  
95 confirm the predominance of Gn as a target of the RVFV nAb response, we pooled sera from  
96 these 6 individuals and repeated the depletion experiment described above and used a focus  
97 reduction neutralization assay (FRNT<sub>50</sub>) to measure RVFV nAbs (see Methods). Results were  
98 consistent, showing a relative reduction in FRNT<sub>50</sub> of approximately 76%, 14% and 70% in  
99 sera depleted of antibodies to Gn, Gc or both, respectively (**Fig. 2c**). These data support RVFV  
100 Gn as the major target of the nAb response arising during natural RVFV infection.

### 101 **IgG and RVFV nAb titers remain high over many years.**

102 To study longevity of the observed immune responses we used three of the six RVFV-exposed  
103 adults from Kilifi county that had corresponding stored serum samples spanning multiple years  
104 (see Methods). We also included stored sera from an additional two RVFV-exposed adults  
105 identified from the same surveillance study in previous years. Overall, the period covered by  
106 each individual's samples ranged from 3-11 years, but dates of RVFV exposure were unknown  
107 (**Fig. 3**). Both IgG (anti-Gn and anti-Gc) and RVFV nAb titers were readily detected over the  
108 period of follow up (**Fig. 3**). In keeping with the two seminal studies on the durability of RVFV  
109 nAb titers, the individual from whom we had the highest number of samples, JA0073 (n=8),  
110 exhibited high nAb titers over an 11-year period (**Fig. 3a**). RVFV nAb titers were generally  
111 stable with only slight reductions from individual peak nAb titers observed. One individual,  
112 JA0193, had a >12 fold increase in nAb titer between their baseline sample and the sample  
113 collected 5 years later, indicating RVFV re-exposure in the intervening period. Total binding  
114 IgG titers towards both glycoproteins were also long-lasting, remaining high despite a gradual  
115 decline over the years, while avidity remained stable (**Fig. 3b, c**).

116

### 117 **RVFV infection elicits a moderately low but significant cellular response to Gn and Gc.**

118 Cryopreserved PBMCs were also available from 5 of the RVFV-exposed adults sampled in  
119 2018 from Kilifi county, allowing an assessment of RVFV-specific T cell responses. We  
120 measured Gn and Gc-specific IFN $\gamma$  responses by ELISpot in five individuals and compared  
121 these to PBMCs from five randomly selected individuals from the same population who had  
122 no evidence of RVFV exposure (on the basis of lacking RVFV nAb or Gn/Gc IgG responses).  
123 Overall, the IFN $\gamma$  response was moderately low in the five RVFV-exposed individuals (mean  
124 response 67.4 SFC/10<sup>6</sup> PBMC 95% CI 6.8-128 SFC/10<sup>6</sup>) but this was significantly higher than  
125 non-exposed controls (mean response 8.4 SFC/10<sup>6</sup> PBMC 95% CI 0-21.7 SFC/10<sup>6</sup>)(**Fig. 4**).  
126 Responses among RVFV-exposed individuals were comparable across individual peptide  
127 pools (**Fig. 4**). Staphylococcal enterotoxin B (SEB) was used as a positive control for PBMC  
128 stimulation and all unexposed and RVFV-exposed individuals had a response >1900 SFC/10<sup>6</sup>  
129 PBMC as expected. Together, these data indicate that natural RVFV exposure elicits a durable  
130 T cell response.

131

## 132 **DISCUSSION**

133 The protective role antibodies play against RVFV infection is well documented (Peters et al.,  
134 1988, LaBeaud, 2010, Niklasson et al., 1984). The structural glycoproteins displayed on the  
135 surface of RVFV, Gn and Gc, are key targets of this protective immune response and  
136 monoclonal antibodies have been identified targeting both (Besselaar and Blackburn, 1991,  
137 Besselaar-Blackburn, 1992, Wang et al., 2019). However, relatively little is known about the  
138 nature and longevity of the immune response after natural RVFV exposure. Here, using  
139 samples from adults in coastal Kenya with evidence of previous exposure to RVFV we show  
140 that: i) RVFV Gn and Gc glycoproteins are both targets of the long-lived T cell and IgG  
141 response to RVFV, and that the antibody response is predominated by the IgG1 sub-class, ii)  
142 RVFV nAb titers strongly correlate with Gn and Gc-specific IgG responses, and that iii) Gn is  
143 the main target of the RVFV nAb response. We also found that IgG avidity against Gn (but not

144 Gc) correlated with the RVFV nAb response, further highlighting qualitative differences in the  
145 antibody response to both glycoproteins.

146

147 Studies in mice and rabbits have identified monoclonal antibodies targeting either Gn or Gc  
148 that are able to neutralize virus and confer protection against RVFV challenge (Besselaar and  
149 Blackburn, 1991, Besselaar-Blackburn, 1992, Keegan and Collett, 1986, Allen et al., 2018).  
150 Initial evidence of the possible greater role that antibodies targeting Gn play in protection, with  
151 respect to the Gc, came from reports involving passive transfer of anti-Gn or anti-Gc antibodies  
152 in mice, with only anti-Gn providing protection (Battles and Dalrymple, 1988). Another study  
153 in mice, this time involving vaccination with Gn- or Gc-coding DNA, showed that those  
154 vaccinated with Gn, but not Gc, developed nAbs (Lagerqvist et al., 2009). A more recent study  
155 isolating mAbs from a convalescent human patient returning to China found that mAbs specific  
156 to Gn exhibited much higher neutralization titers than those that bind Gc (Wang et al., 2019).  
157 This provides some evidence, perhaps, that the larger negative impact on neutralization titer  
158 seen in our study after depleting antibodies targeting Gn, compared to Gc, reflects a greater  
159 neutralizing potential of anti-Gn antibodies rather than merely increased abundance over anti-  
160 Gc antibodies. Further evidence supporting this hypothesis can be observed from our  
161 measurement of IgG avidity. Higher avidity antibodies can bind antigen more efficiently, and  
162 only the higher avidity of anti-Gn antibodies was associated with increased nAb titer. While  
163 avidity was very stable over many years, it is typically lower in acute or recent infection.  
164 However, due to the sparse sampling (no more than once a year), initial changes in the weeks  
165 and months post-exposure are not visible.

166

167 It is important to consider the differences between monomeric and soluble RVFV Gn and Gc  
168 used in these assays and their higher order membrane-bound pentameric and hexameric  
169 assemblies on the virion surface (Lozach et al., 2011, Leger et al., 2016). While our data  
170 shows that dual depletion of both Gn and Gc antibodies reduces nAb titers to identical levels

171 seen in sera depleted of Gn antibodies alone, even dual-depleted sera can neutralize live virus  
172 at the highest concentration (**Fig. 2**). While this is likely due, at least in part, to the incomplete  
173 nature of the depletion (corresponding ELISA signal post-depletion was not entirely eliminated  
174 at high serum concentrations), it is also likely that a subset of antibodies recognize epitopes  
175 constituting higher-order quaternary assemblies formed on the native virion surface. These  
176 antibodies may be capable of neutralizing whole virus but may not bind monomeric Gn or Gc  
177 and therefore would not have been depleted. Nevertheless, we were still able to assess the  
178 relative contribution antibodies targeting each individual glycoprotein have on neutralization.  
179 While both glycoproteins are clearly immunogenic and targeted by the nAb response, our data  
180 suggest that after naturally acquired human infection antibodies targeting Gn, rather than Gc,  
181 play a larger role in RVFV neutralization. This is perhaps not surprising considering that the  
182 N-terminal component of Gn occupies the most membrane-distal region of the virus, which  
183 plays a role in shielding the cognate Gc (Halldorsson et al., 2018a, Allen et al., 2018), and  
184 therefore may be more easily accessible to the host immune system (**Fig. 5**).

185

186 While protection against RVFV infection has long been associated with the induction of nAbs  
187 targeting Gn and Gc (Dodd et al., 2013, Peters et al., 1988, LaBeaud, 2010), it can also arise  
188 from other mechanisms. Mice vaccinated with the immunodominant nucleoprotein (N), for  
189 example, show partial protection from RVFV challenge despite the absence of detectable  
190 nAbs (Lopez-Gil et al., 2013, Jansen van Vuren et al., 2011). Another study showed the  
191 cooperative effect of a non-neutralizing antibody improving protection in a mouse model  
192 (Gutjahr et al., 2020). Perhaps more surprisingly, mice vaccinated with modified Vaccinia  
193 Ankara (MVA) expressing both Gn and Gc failed to elicit nAbs but were still protected from  
194 viral challenge (Lopez-Gil et al., 2020). IgG1, the predominant subclass recognising the RVFV  
195 glycoproteins identified here, can efficiently trigger the classical route of complement  
196 (Vidarsson et al., 2014). While the contribution that non-neutralizing antibodies and cellular  
197 immunity have on protection against RVFV is less well characterized, numerous components



198 of the immune response may function together during acute infection (including experimental  
199 challenge in animals) to provide protection. Studies on the immune response during acute  
200 RVFV infections in humans are needed to determine the role of other immune mechanisms in  
201 disease pathogenesis and protection.

202

203 Due to its extensive anti-viral properties, we have used IFN $\gamma$  as a broad measure of the cellular  
204 response to RVFV in these individuals. The *ex vivo* ELISpot carried out here is a measure of  
205 effector memory T cells that are able to secrete IFN $\gamma$  within hours of re-exposure to antigen  
206 (Calarota and Baldanti, 2013). We have shown that these cells, circulating in the peripheral  
207 blood, are relatively low in number in humans with historical RVFV infection. However, they  
208 are still detectable in the majority of individuals many years after exposure and they may  
209 potentially play an important role in protection. Recently, the T cell responses in human  
210 volunteers vaccinated with multiple doses of a formalin-inactivated RVF vaccine were  
211 characterized (Harmon et al., 2020). Despite also showing a generally low cellular response,  
212 IFN $\gamma$  expression post-stimulation with Gn, Gc and N peptides were detected by ELISpot many  
213 years post vaccination. A previous study exploring the cellular response to RVFV in a non-  
214 human primate model have shown that non-lethal challenge was associated with early  
215 proliferation of CD4 $^{+}$  and CD8 $^{+}$  T cells in addition to early Th1 cytokine production, including  
216 IFN $\gamma$  (Wonderlich et al., 2018). Another study in humans showed higher expression of IL-10,  
217 an anti-inflammatory cytokine, was associated with fatal cases (McElroy and Nichol, 2012).  
218 These findings, together with the critical role CD4 $^{+}$  T cells play in generating strong antibody  
219 responses (Dodd et al., 2013), indicate the importance and benefit of a robust cellular  
220 response.

221

222 Due to the presence of high-titer, long-lived nAbs, it is plausible that the naturally acquired  
223 immune response to RVFV may be sufficient for long-lasting protection, particularly as nAbs  
224 are associated with protection in animals. The observation that antibodies targeting Gn play a

225 comparatively larger role in neutralization than those that target Gc has potential implications  
226 for vaccine design and is suggestive that the Gn may be the most critical antigen to include in  
227 RVFV candidate vaccines.

228

229 In summary, while our immunological assessments of individuals naturally exposed to RVFV  
230 provide useful data on immunity to infection, there is a lot that we do not know regarding their  
231 previous RVFV exposure; when or how often they became infected prior to sample collection,  
232 the route of exposure (mosquito bite vs contact with infected animal tissue) and their clinical  
233 manifestations. All of these factors will have likely influenced their subsequent response to  
234 RVFV and further work is needed to connect immunological attributes with clinical outcomes  
235 and disease severity. We have provided data characterizing the immune response in a large  
236 number of naturally exposed Kenyan adults who are likely protected from re-exposure. These  
237 data can provide a useful benchmark for immune responses elicited in future clinical trials of  
238 candidate vaccines.

239

## 240 **MATERIALS AND METHODS**

### 241 ***Study population***

242 A cross-section of randomly selected households in Tana River County, Kenya (2013-2014)  
243 were enrolled after consenting and all human subjects within that household were sampled as  
244 part of a previous study estimating RVFV exposure (Bett et al., 2018). For this analysis, serum  
245 samples from 50 individuals were selected at random for antibody characterization from those  
246 identified as RVFV-exposed on the basis of seropositivity by both RVFV neutralization assay  
247 (VNT<sub>50</sub> >10) and a diagnostic ELISA kit (BDSL, National Institute for Communicable Diseases,  
248 Centre for Emerging and Zoonotic Diseases, Johannesburg, South Africa) (Paweska et al.,  
249 2005). A further 7 RVFV-exposed individuals from the same study and with sufficient material  
250 available were assessed in the antibody depletion assays. Serum and peripheral blood

251 mononuclear cells (PBMCs) were available from 200 adults under longitudinal surveillance for  
252 malaria studies in Kilifi County in 2018. For some of these adults, serum samples were  
253 available dating back to 1998 when they were enrolled into the longitudinal cohort. Additional  
254 screening of the serum samples collected in 2013-2014 identified positive individuals not  
255 sampled in 2018. Blood samples were collected in plain vacutainers and serum harvested  
256 after centrifugation at 3,000 RPM for 5 minutes, before storage at -80°C until use. Heparinised  
257 blood was used for PBMC isolation using standard protocols (Illingworth et al., 2013) and  
258 PBMCs cryopreserved until use. Ethical approval for this study was provided by the Kenya  
259 Medical Research Institute Scientific and Ethics Review Unit (SSC 3296), and the African  
260 Medical Research Foundation's Ethics and Scientific Review Committee (approval number  
261 P65-2013).

## 262 ***Protein Expression***

263 ***RVFV Gn:*** cDNA of the Gn ectodomain (UniProt accession number P21401, residues 154-  
264 560) was cloned into pHLSec mammalian expression vector, which encodes a C-terminal  
265 hexa-histidine tag (Aricescu et al., 2006). Human embryonic kidney cells (HEK293T, ATCC  
266 CRL-1573) were transiently transfected and cell supernatants were purified by immobilized  
267 nickel-affinity chromatography (IMAC), using 5 mL HisTrap FF crude column and AKTA FPLC  
268 system (GE Healthcare). Gn protein was further purified by size exclusion chromatography  
269 (SEC) using a Superdex 200 10/300 Increase column (GE Healthcare) into 10mM Tris-HCl,  
270 150mM NaCl, pH 8.0.

271

272 ***RVFV Gc:*** cDNA of the Gc ectodomain (UniProt accession number P21401, residues 691-  
273 1120) linked to an N-terminal SUMO tag, which also encodes a hexa-histidine tag, was  
274 subcloned into the pURD expression vector to generate a stable cell line in HEK293T cells  
275 (Seiradake et al., 2015). Cells were harvested after 5 days and RVFV Gc was purified from  
276 clarified cell supernatant by IMAC. The SUMO-tag was cleaved with 3C protease (Pearsons)  
277 overnight at room temperature. Cleaved RVFV Gc was purified from the SUMO-tag by IMAC.

278 The flowthrough containing Gc was further purified by SEC using a Superdex 200 10/300  
279 Increase column (GE Healthcare) into 10mM Tris-HCl, 150mM NaCl, pH 8.0.

280

### 281 ***Total IgG enzyme linked immunosorbent assays (ELISAs)***

282 96 well NUNC flat bottom plates (ThermoFisher) were coated with 50 µl/well of Gn or Gc at a  
283 concentration of 1 µg/mL in carbonate bicarbonate buffer (Sigma) and incubated overnight at  
284 room temperature (RT). Plates were washed 6x with phosphate buffered saline containing  
285 0.05% Tween20 (PBS/T) followed by blocking with 100 µl/well of casein (ThermoFisher) for 1  
286 hour at RT. Plates were then tapped dry and test sera was diluted 1:100, 1:400 or 1:800 in  
287 casein. 50 µl/well was added to duplicate wells and incubated for 2h at RT. A positive  
288 reference serum made from a pool of high responders (using raw OD<sub>450</sub> as measured by initial  
289 Gn/Gc ELISAs) was included on each plate as a standard curve. This was serially diluted in  
290 2-fold steps from 1:100 to 1:51,200 in casein. Each dilution was added to the plate in duplicate,  
291 with the 1:100 dilutions given an arbitrary value of 10 RVFV antibody units (AU). Plates were  
292 washed as before and 50 µl/well of secondary antibody (goat anti-human whole IgG  
293 conjugated to HRP, Insight Biotechnology) was diluted 1:1,000 in casein and added to the  
294 plate for 1h at RT. Plates were washed a final time and developed by adding 100 µl/well of  
295 TMB developer (Abcam). After 8 minutes incubating in the dark at RT, 100 µl TMB stop  
296 solution (Abcam) was added. The optical density (OD) was read at 450 nm using a Varioskan  
297 flash reader. OD values were fitted to a 4-Parameter logistic model (Gen5 v3.09, BioTek)  
298 standard curve. An internal control of positive serum was included on every plate in duplicate  
299 made up from a 1:800 dilution of the positive standard. Test sera arbitrary units (AU) were  
300 calculated from their OD values using the parameters estimated from the standard curve.

301

### 302 ***IgG avidity ELISAs***

303 Total IgG avidity was determined by sodium thiocyanate (NaSCN) displacement, as described  
304 previously (Biswas et al., 2014). Briefly, sera was individually diluted in casein to normalise  
305 titers, according to their total IgG ELISA AU. Plate coating, blocking and development were  
306 performed the same as their respective total IgG ELISAs.

307

### 308 ***IgG Subclass ELISAs***

309 IgG subclass ELISAs were performed as per the total IgG ELISAs with the following  
310 exceptions: Secondary antibodies (biotin conjugated mouse anti-human IgG1, IgG2, IgG3 or  
311 IgG4 [Bio-Rad]) were incubated for 1h. After washing, 50 µL/well of eXtravidin-ALP (Sigma),  
312 diluted 1:5,000 in casein was added for 1h. Plates were washed and then developed by adding  
313 50 µl/well of 4-nitrophenyl phosphate in diethanolamine buffer (Pierce). OD was read at 405  
314 nm.

315

### 316 ***Virus Neutralization assays (VNT and FRNT)***

317 VNT: The dilution required to reduce neutralization by 50% (VNT<sub>50</sub>) was calculated, as  
318 described previously (Lopez-Gil et al., 2013). Briefly, sera pools were diluted in DMEM  
319 containing 10% FCS (D10) across a 96-well plate before addition of 100 TCID<sub>50</sub> of RVFV MP-  
320 12 strain. Sera and virus were incubated at 37 °C for 1h in 200 µl before being added to a 96  
321 well tissue culture (TC) plate containing a confluent monolayer of VERO cells. Plates were  
322 incubated at 37 °C for 72h before cells were fixed in PBS containing 10% formaldehyde for 1h  
323 and stained with PBS containing 1% crystal violet (Sigma) for 10 minutes. Plates were washed  
324 with water and left to dry before being scored by eye. Focus reduction neutralizing test (FRNT):  
325 This was carried out as previously described (Barsosio et al., 2019) with some alterations.  
326 Briefly, serum was diluted in 2-fold steps in triplicate from a starting dilution of 1:20.-  
327 Approximately 100 focus-forming units of RVFV (MP-12 strain) was added to each well and  
328 incubated for 1h at 37 °C before transferring mixture to 96-well Tissue Culture plate containing

329 Vero E6 monolayers at 90% confluency. After 2h at 37 °C, virus/serum was removed and  
330 replaced with media. Plates were incubated a further 48h at 37 °C. Virus foci were detected  
331 by adding 1:1000 dilution of Anti-Gn 4D4 mouse mAb (bei resources, Cat. No. NR-43190)  
332 followed by 1:1000 dilution of horseradish peroxidase (HRP)-conjugated goat anti-mouse IgG  
333 antibody (Abcam, Cat. No. ab6789). After addition of 3,3'-diaminobenzidine (Sigma) substrate  
334 for 10 minutes at room temperature, the plates were washed a final time and air dried. Foci  
335 were counted using an AID ELISpot reader. Serum dilution required to reduce virus foci by  
336 50% compared to virus-only control wells (6 replicates) were calculated from a 4-parameter  
337 standard curve using GraphPad Prism version 8 (GraphPad Software Inc., California, USA).

338

### 339 ***Gn and Gc specific antibody depletion***

340 In order to deplete anti-Gc and/or anti-Gn IgG, 96-well NUNC ELISA plates were coated with  
341 5 µg/mL of recombinant Gn or Gc or carbonate-bicarbonate buffer alone. Plates were  
342 incubated overnight. After washing with PBS/T as previously described, plates were blocked  
343 with 200 µL/well of 1% casein in PBS (Sigma) for 2h. Neat pooled human sera was diluted  
344 1:50 in DMEM containing 2% L-glutamine and 1% penicillin/streptomycin (D0) with  
345 subsequent 1:2 titrations up to 1:102400. Diluted sera was added to each antigen-coated plate  
346 (including the blocked but uncoated control plate) and incubated on a plate rocker at 10 RPM  
347 for 4h at room temperature. Serum was then removed and the depletion step repeated once  
348 more on additional coated and blocked plates. For the dual Gn/Gc depletion, serum was  
349 depleted twice on Gn-coated plates and twice on Gc-coated plates. Reduction of antigen-  
350 specific antibodies after final depletion was confirmed by ELISA. Serum was diluted 1:2 with  
351 Casein and total IgG ELISA was carried out as described. The endpoint titer is defined as the  
352 interpolated dilution (OD at 450nm versus dilution of serum) at which the OD of the sample is  
353 0.15. The remaining serum was added to the VNT plate to determine nAb titer, as previously  
354 described, with final serum concentrations ranging from 1:200-1:102,400 (Barsosio et al.,  
355 2019).

356

### 357 ***Ex-vivo* IFN $\gamma$ ELISpot**

358 264 15mer peptides overlapping by 11 amino acids, covering the Gn-Gc polyprotein (Genbank  
359 accession number DQ380208, residues 132-1197) were synthesised (Mimotopes). Peptides  
360 were split into 5 pools of 52/53 peptides each at 1.25  $\mu$ g/mL final concentration. ELISpots were  
361 carried out as previously described (Kimani et al., 2014). Responses from unstimulated wells  
362 were subtracted before quantifying the response to the 5 pools and summing them. Positive  
363 control wells were stimulated with SEB at 0.02  $\mu$ g/mL.

364

### 365 ***Statistical analysis***

366 Statistical analysis was carried out using GraphPad Prism version 8 (GraphPad Software Inc.,  
367 California, USA). All analyses of correlations were performed using non-parametric  
368 Spearman's correlation tests using a two-sided p value < 0.05 as the cut-off for statistical  
369 significance. Comparisons between two groups were analysed using Kruskal-Wallis test or  
370 unpaired T-test.

371

### 372 **AUTHOR CONTRIBUTIONS**

373 Conceptualization D.W., G.M.W. and T.A.B.; Methodology, D.W., E.R.A., J.N.G., H.K.K.  
374 G.M.W; Investigation, D.W., M.H.A.C., J.N.G., H.K.K.; Resources, R.H., I.T., S.B., E.R.A.,  
375 D.M., J.M., B.B.; Writing – Original Draft, D.W; Writing – review editing, G.M.W., T.A.B.;  
376 Funding acquisition, G.M.W., T.A.B; Supervision; G.M.W., T.A.B.

377

### 378 **DECLARATION OF INTERESTS**

379 The authors declare no competing interests.

380

## 381 **ACKNOWLEDGEMENTS**

382 This work was supported through grants from the Wellcome Trust (grants no. 203077/Z/16/Z  
383 and 203141/Z/16/Z), an Oak foundation fellowship to GMW, and by the Medical Research  
384 Council (MR/L009528/1m MR/S007555/1, MR/N002091/1 to T.A.B.). This manuscript was  
385 submitted for publication with permission from the Director of the Kenya Medical Research  
386 Institute.

387

## 388 **REFERENCES**

- 389 Allen, E. R., Krumm, S. A., Raghwani, J., Halldorsson, S., Elliott, A., Graham, V. A., Koudriakova, E.,  
390 Harlos, K., Wright, D., Warimwe, G. M., et al. 2018. A Protective Monoclonal Antibody Targets a Site  
391 of Vulnerability on the Surface of Rift Valley Fever Virus. *Cell Rep*, 25, 3750-3758.e4.
- 392 Aricescu, A. R., Lu, W. & Jones, E. Y. 2006. A time- and cost-efficient system for high-level protein  
393 production in mammalian cells. *Acta Crystallogr D Biol Crystallogr*, 62, 1243-50.
- 394 Barsosio, H. C., Gitonga, J. N., Karanja, H. K., Nyamwaya, D. K., Omuoyo, D. O., Kamau, E., Hamaluba,  
395 M. M., Nyiro, J. U., Kitsao, B. S., Nyaguara, A., et al. 2019. Congenital microcephaly unrelated to  
396 flavivirus exposure in coastal Kenya. *Wellcome Open Res*, 4, 179.
- 397 Battles, J. K. & Dalrymple, J. M. 1988. Genetic variation among geographic isolates of Rift Valley fever  
398 virus. *Am J Trop Med Hyg*, 39, 617-31.
- 399 Besselaar-Blackburn 1992. The synergistic neutralization of Rift Valley fever virus by monoclonal  
400 antibodies to the envelope glycoproteins.
- 401 Besselaar, T. G. & Blackburn, N. K. 1991. Topological mapping of antigenic sites on the Rift Valley  
402 fever virus envelope glycoproteins using monoclonal antibodies. *Arch Virol*, 121, 111-24.
- 403 Bett, B., Lindahl, J., Sang, R., Wainaina, M., Kairu-Wanyoike, S., Bukachi, S., Njeru, I., Karanja, J.,  
404 Ontiri, E., Kariuki Njenga, M., et al. 2018. Association between Rift Valley fever virus seroprevalences  
405 in livestock and humans and their respective intra-cluster correlation coefficients, Tana River County,  
406 Kenya. *Epidemiol Infect*, 1-9.
- 407 Biswas, S., Choudhary, P., Elias, S. C., Miura, K., Milne, K. H., De Cassan, S. C., Collins, K. A., Halstead,  
408 F. D., Bliss, C. M., Ewer, K. J., et al. 2014. Assessment of humoral immune responses to blood-stage  
409 malaria antigens following ChAd63-MVA immunization, controlled human malaria infection and  
410 natural exposure. *PLoS One*, 9, e107903.



- 411 Brown, R. D., Scott, G. R. & Dalling, T. 1957. Persistence of antibodies to Rift Valley fever in man. *The*  
412 *Lancet*, 270, 345.
- 413 Calarota, S. A. & Baldanti, F. 2013. Enumeration and characterization of human memory T cells by  
414 enzyme-linked immunospot assays. *Clinical & developmental immunology*, 2013, 637649-637649.
- 415 Cdc. 2020. *Rift Valley Fever (RVF) Outbreak Summaries* [Online]. Available:  
416 <https://www.cdc.gov/vhf/rvf/outbreaks/summaries.html> [Accessed 20th July 2020].
- 417 Daubney, R., Hudson, J. R. & Garnham, P. C. 1931a. Enzootic hepatitis or rift valley fever. An  
418 undescribed virus disease of sheep cattle and man from east africa. *The Journal of Pathology and*  
419 *Bacteriology*, 34, 545-579.
- 420 Daubney, R., Hudson, J. R. & Garnham, P. C. 1931b. Enzootic hepatitis or Rift Valley fever. An  
421 undescribed virus disease of sheep, cattle and man from east africa. *J. Pathol. Bacteriol*, 34, 545-79.
- 422 Dodd, K. A., Mcelroy, A. K., Jones, M. E., Nichol, S. T. & Spiropoulou, C. F. 2013. Rift Valley fever virus  
423 clearance and protection from neurologic disease are dependent on CD4+ T cell and virus-specific  
424 antibody responses. *J Virol*, 87, 6161-71.
- 425 Easterday, B. C. 1965. Rift valley fever. *Adv Vet Sci*, 10, 65-127.
- 426 Findlay, G. M. 1936. The Mechanism of Immunity in Rift Valley Fever. *Wellcome Bureau of Scientific*  
427 *Research*, 89-104.
- 428 Freiberg, A. N., Sherman, M. B., Morais, M. C., Holbrook, M. R. & Watowich, S. J. 2008. Three-  
429 dimensional organization of Rift Valley fever virus revealed by cryoelectron tomography. *J Virol*, 82,  
430 10341-8.
- 431 Gouglas, D., Thanh Le, T., Henderson, K., Kaloudis, A., Danielsen, T., Hammersland, N. C., Robinson, J.  
432 M., Heaton, P. M. & Røttingen, J.-A. 2018. Estimating the cost of vaccine development against  
433 epidemic infectious diseases: a cost minimisation study. *The Lancet Global Health*, 6, e1386-e1396.
- 434 Gutjahr, B., Keller, M., Rissmann, M., Von Arnim, F., Jackel, S., Reiche, S., Ulrich, R., Groschup, M. H.  
435 & Eiden, M. 2020. Two monoclonal antibodies against glycoprotein Gn protect mice from Rift Valley  
436 Fever challenge by cooperative effects. *PLoS Negl Trop Dis*, 14, e0008143.
- 437 Halldorsson, S., Li, S., Li, M., Harlos, K., Bowden, T. A. & Huiskonen, J. T. 2018a. Shielding and  
438 activation of a viral membrane fusion protein. *Nat Commun*, 9, 349.
- 439 Halldorsson, S., Li, S., Li, M., Harlos, K., Bowden, T. A. & Huiskonen, J. T. 2018b. Shielding and  
440 activation of a viral membrane fusion protein. *Nature Communications*, 9, 349.
- 441 Harmon, J. R., Barbeau, D. J., Nichol, S. T., Spiropoulou, C. F. & Mcelroy, A. K. 2020. Rift Valley fever  
442 virus vaccination induces long-lived, antigen-specific human T cell responses. *NPJ Vaccines*, 5, 17.
- 443 Huiskonen, J. T., Overby, A. K., Weber, F. & Grunewald, K. 2009. Electron cryo-microscopy and single-  
444 particle averaging of Rift Valley fever virus: evidence for GN-GC glycoprotein heterodimers. *J Virol*,  
445 83, 3762-9.

- 446 Ictv. 2020. *International Committee on Taxonomy of Viruses (ICTV)* [Online]. Available:  
447 <https://talk.ictvonline.org/taxonomy/> [Accessed 21st July 2020].
- 448 Illingworth, J., Butler, N. S., Roetynck, S., Mwacharo, J., Pierce, S. K., Bejon, P., Crompton, P. D.,  
449 Marsh, K. & Ndungu, F. M. 2013. Chronic exposure to *Plasmodium falciparum* is associated with  
450 phenotypic evidence of B and T cell exhaustion. *Journal of immunology (Baltimore, Md. : 1950)*, 190,  
451 1038-1047.
- 452 Jansen Van Vuren, P., Tiemessen, C. T. & Paweska, J. T. 2011. Anti-nucleocapsid protein immune  
453 responses counteract pathogenic effects of Rift Valley fever virus infection in mice. *PLoS One*, 6,  
454 e25027.
- 455 Keegan, K. & Collett, M. S. 1986. Use of bacterial expression cloning to define the amino acid  
456 sequences of antigenic determinants on the G2 glycoprotein of Rift Valley fever virus. *J Virol*, 58,  
457 263-70.
- 458 Kimani, D., Jagne, Y. J., Cox, M., Kimani, E., Bliss, C. M., Gitau, E., Ogwang, C., Afolabi, M. O., Bowyer,  
459 G., Collins, K. A., et al. 2014. Translating the immunogenicity of prime-boost immunization with  
460 ChAd63 and MVA ME-TRAP from malaria naive to malaria-endemic populations. *Mol Ther*, 22, 1992-  
461 2003.
- 462 Labeaud, D. 2010. Towards a safe, effective vaccine for Rift Valley fever virus. *Future virology*, 5, 675-  
463 678.
- 464 Lagerqvist, N., Naslund, J., Lundkvist, A., Bouloy, M., Ahlm, C. & Bucht, G. 2009. Characterisation of  
465 immune responses and protective efficacy in mice after immunisation with Rift Valley Fever virus  
466 cDNA constructs. *Virology*, 6, 6.
- 467 Leger, P., Tetard, M., Youness, B., Cordes, N., Rouxel, R. N., Flamand, M. & Lozach, P. Y. 2016.  
468 Differential Use of the C-Type Lectins L-SIGN and DC-SIGN for Phlebovirus Endocytosis. *Traffic*, 17,  
469 639-56.
- 470 Lopez-Gil, E., Lorenzo, G., Hevia, E., Borrego, B., Eiden, M., Groschup, M., Gilbert, S. C. & Brun, A.  
471 2013. A single immunization with MVA expressing GnGc glycoproteins promotes epitope-specific  
472 CD8+T cell activation and protects immune-competent mice against a lethal RVFV infection. *PLoS*  
473 *Negl Trop Dis*, 7, e2309.
- 474 Lopez-Gil, E., Moreno, S., Ortego, J., Borrego, B., Lorenzo, G. & Brun, A. 2020. MVA Vectored  
475 Vaccines Encoding Rift Valley Fever Virus Glycoproteins Protect Mice against Lethal Challenge in the  
476 Absence of Neutralizing Antibody Responses. *Vaccines (Basel)*, 8.
- 477 Lozach, P. Y., Kuhbacher, A., Meier, R., Mancini, R., Bitto, D., Bouloy, M. & Helenius, A. 2011. DC-  
478 SIGN as a receptor for phleboviruses. *Cell Host Microbe*, 10, 75-88.
- 479 McElroy, A. K. & Nichol, S. T. 2012. Rift Valley fever virus inhibits a pro-inflammatory response in  
480 experimentally infected human monocyte derived macrophages and a pro-inflammatory cytokine  
481 response may be associated with patient survival during natural infection. *Virology*, 422, 6-12.
- 482 Mehand, M. S., Al-Shorbaji, F., Millett, P. & Murgue, B. 2018. The WHO R&D Blueprint: 2018 review  
483 of emerging infectious diseases requiring urgent research and development efforts. *Antiviral*  
484 *Research*, 159, 63-67.

- 485 Nicholas, D. E., Jacobsen, K. H. & Waters, N. M. 2014. Risk factors associated with human Rift Valley  
486 fever infection: systematic review and meta-analysis. *Trop Med Int Health*, 19, 1420-9.
- 487 Niklasson, B. S., Meadors, G. F. & Peters, C. J. 1984. Active and passive immunization against Rift  
488 Valley fever virus infection in Syrian hamsters. *Acta Pathol Microbiol Immunol Scand C*, 92, 197-200.
- 489 Paweska, J. T., Mortimer, E., Leman, P. A. & Swanepoel, R. 2005. An inhibition enzyme-linked  
490 immunosorbent assay for the detection of antibody to Rift Valley fever virus in humans, domestic  
491 and wild ruminants. *Journal of Virological Methods*, 127, 10-18.
- 492 Peters, C. J., Jones, D., Trotter, R., Donaldson, J., White, J., Stephen, E. & Slone, T. W., Jr. 1988.  
493 Experimental Rift Valley fever in rhesus macaques. *Arch Virol*, 99, 31-44.
- 494 Seiradake, E., Zhao, Y., Lu, W., Aricescu, A. R. & Jones, E. Y. 2015. Production of cell surface and  
495 secreted glycoproteins in mammalian cells. *Methods Mol Biol*, 1261, 115-27.
- 496 Sherman, M. B., Freiberg, A. N., Holbrook, M. R. & Watowich, S. J. 2009. Single-particle cryo-electron  
497 microscopy of Rift Valley fever virus. *Virology*, 387, 11-5.
- 498 Smithburn, K. C., Mahaffy, A. F., Haddow, A. J., Kitchen, S. F. & Smith, J. F. 1949. Rift Valley fever;  
499 accidental infections among laboratory workers. *J Immunol*, 62, 213-27.
- 500 Vidarsson, G., Dekkers, G. & Rispen, T. 2014. IgG subclasses and allotypes: from structure to  
501 effector functions. *Frontiers in immunology*, 5, 520-520.
- 502 Wang, Q., Ma, T., Wu, Y., Chen, Z., Zeng, H., Tong, Z., Gao, F., Qi, J., Zhao, Z., Chai, Y., et al. 2019.  
503 Neutralization mechanism of human monoclonal antibodies against Rift Valley fever virus. *Nature*  
504 *Microbiology*.
- 505 Weingartl, H. M., Zhang, S., Marszal, P., Mcgreevy, A., Burton, L. & Wilson, W. C. 2014. Rift Valley  
506 fever virus incorporates the 78 kDa glycoprotein into virions matured in mosquito C6/36 cells. *PLoS*  
507 *One*, 9, e87385.
- 508 Wonderlich, E. R., Caroline, A. L., Mcmillen, C. M., Walters, A. W., Reed, D. S., Barratt-Boyes, S. M. &  
509 Hartman, A. L. 2018. Peripheral Blood Biomarkers of Disease Outcome in a Monkey Model of Rift  
510 Valley Fever Encephalitis. *Journal of Virology*, 92, e01662-17.
- 511 Wright, D., Kortekaas, J., Bowden, T. A. & Warimwe, G. M. 2019. Rift Valley fever: biology and  
512 epidemiology. *J Gen Virol*, 100, 1187-1199.

513

514 **FIGURES**

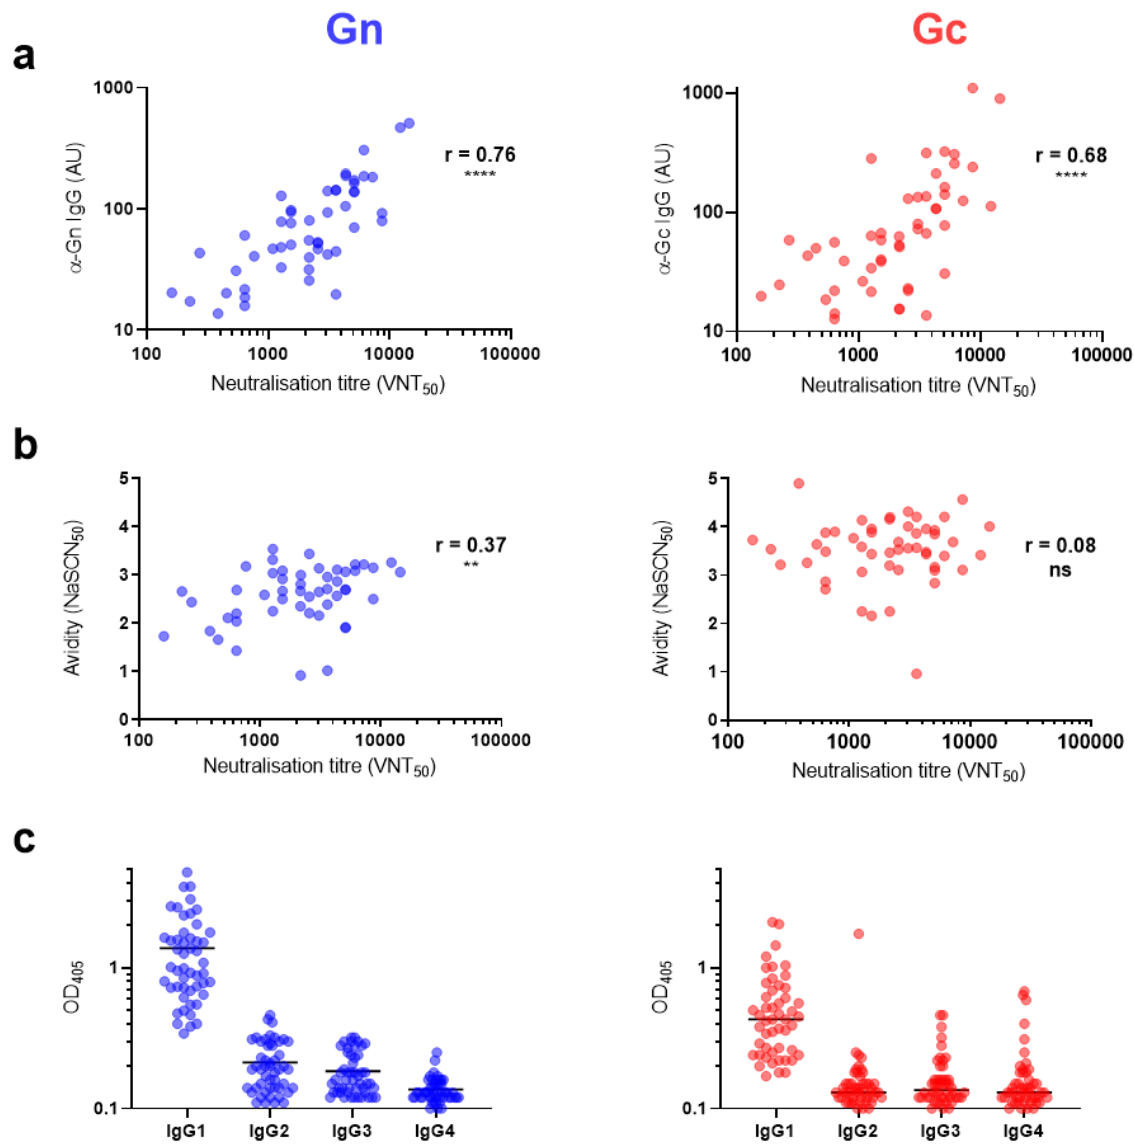

515

516 **Figure 1.** Total IgG titer towards recombinant Gn and Gc correlate strongly with neutralizing  
517 antibody titer. (a) Correlations between neutralization titer, as measured by VNT<sub>50</sub> assay, and  
518 total IgG titer towards Gn and Gc, as measured by ELISA (Gn:  $r=0.76$ , 95% CI: 0.60-0.86. Gc;  
519  $r=0.68$ , 95%CI: 0.49- 0.81). \*\*\*\* =  $P<0.0001$ . (b) Correlations between neutralization titer and  
520 avidity of total IgG towards Gn and Gc (Gn:  $r=0.37$ , 95% CI: 0.09-0.59, \*\*; Gc:  $r= 0.08$ , 95%CI:  
521 -0.21-0.36,  $p=0.57$ ). \*\* =  $P=0.009$ . (c) IgG subclass response towards Gn and Gc. Lines  
522 represent geometric means.

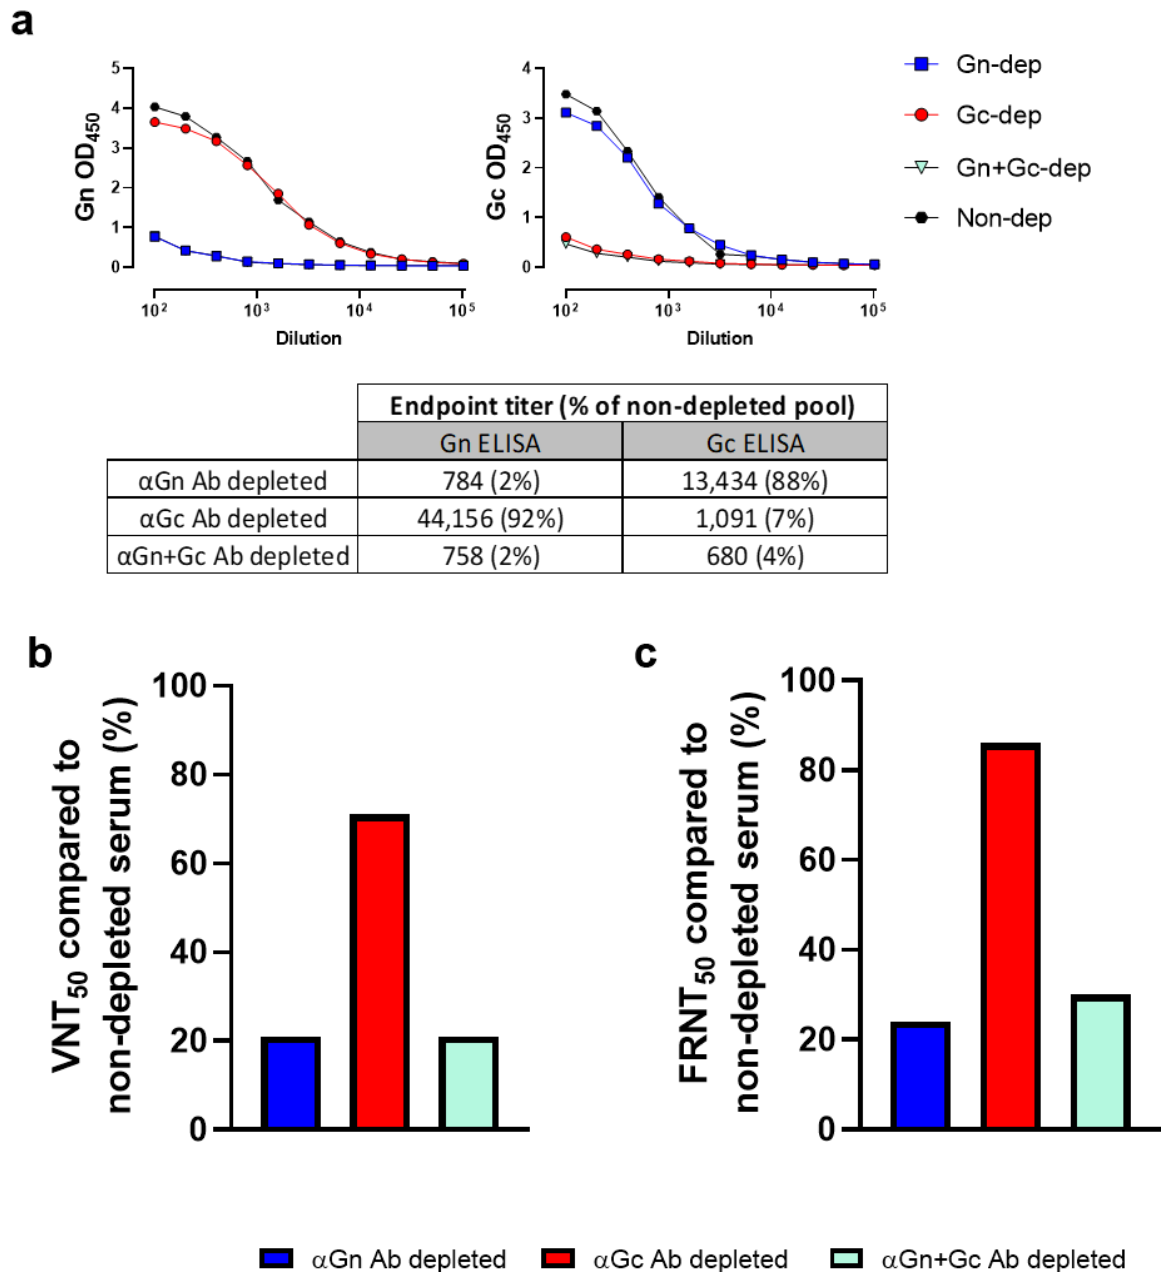

523

524 **Figure 2.** Neutralizing antibody titers predominantly target RVFV Gn over Gc. Individual sera  
 525 were pooled from individuals in Tana River county (n=7) and depleted of anti-Gn antibodies,  
 526 anti-Gc antibodies, both or neither. (a) Confirmation of depletion by Gn ELISA (left) and Gc  
 527 ELISA (right) with Gn and Gc Endpoint titers of each pool calculated in the table. (b)  
 528 Neutralization titer (VNT<sub>50</sub>) of each depleted pool as a percentage of non-depleted serum  
 529 (VNT<sub>50</sub> of Gn antibody depletion, 1600; Gc antibody depletion, 5344; Gn+Gc antibody

530 depletion, 1600; non-depleted, 7557). (c) Neutralization titer (FRNT<sub>50</sub>) after repeating  
531 experiment using an entirely different serum pooled from individuals from Kilifi county (n=6).  
532

**a**

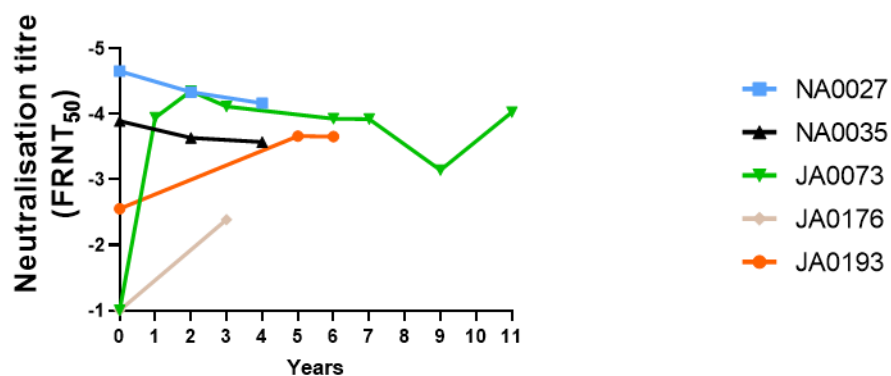

**b**

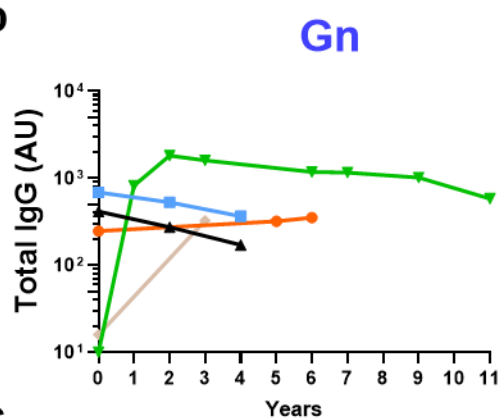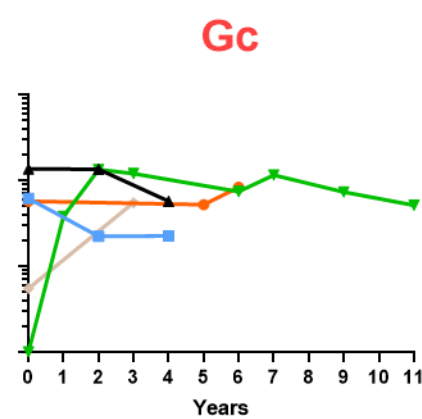

**c**

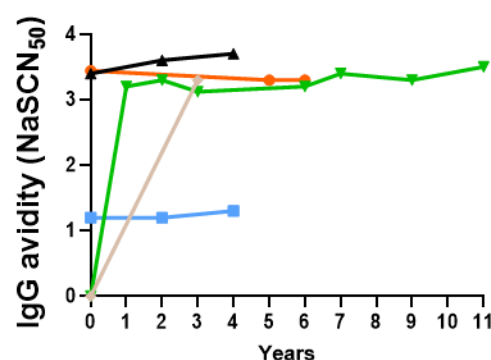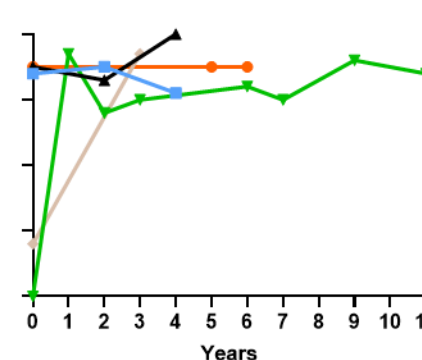

533

534 **Figure 3.** Natural exposure to RVFV elicits a high-titer, long-lived humoral response. Five  
535 individuals from Kilifi county (see text) with serum samples spanning 3-11 years were assayed

536 for (a) Neutralization titer, (b) IgG titer of anti-Gn (left) and anti-Gc (right), (c) IgG avidity of  
 537 anti-Gn IgG (left) and anti-Gc IgG (right). Year 0 is their earliest available sample, not  
 538 necessarily the year of exposure, with subsequent samples plotted relative to that.

539

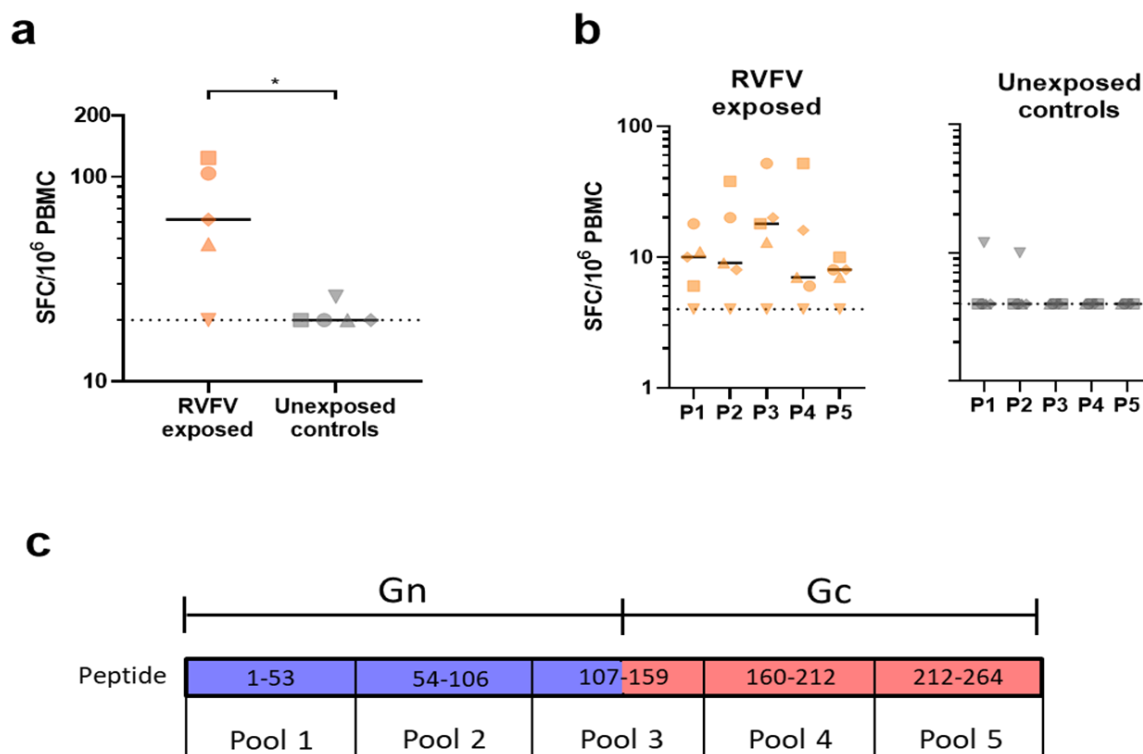

540

541 **Figure 4.** A low but significant *Ex vivo* IFN $\gamma$  ELISpot response in naturally exposed individuals.  
 542 PBMC from five RVFV-exposed individuals along with 5 case-matched non-exposed controls  
 543 were stimulated with an overlapping peptide library spanning the GnGc polyprotein. (a)  
 544 Summed responses from the five peptide pools showing significantly higher response in the  
 545 naturally exposed group compared to naïve controls (\* $P < 0.05$ , unpaired *t* test). (b) Responses  
 546 to individual peptide pools, dotted line represent the lower limit of detection of 4 SFC/10 $^6$   
 547 PBMC for individual pools and 20 SFC/10 $^6$  PBMC for summed responses. SEB stimulated  
 548 cells for each volunteer gave >1900 SFC/10 $^6$  PBMC (c) Schematic of the overlapping peptide  
 549 library used for stimulation.

550

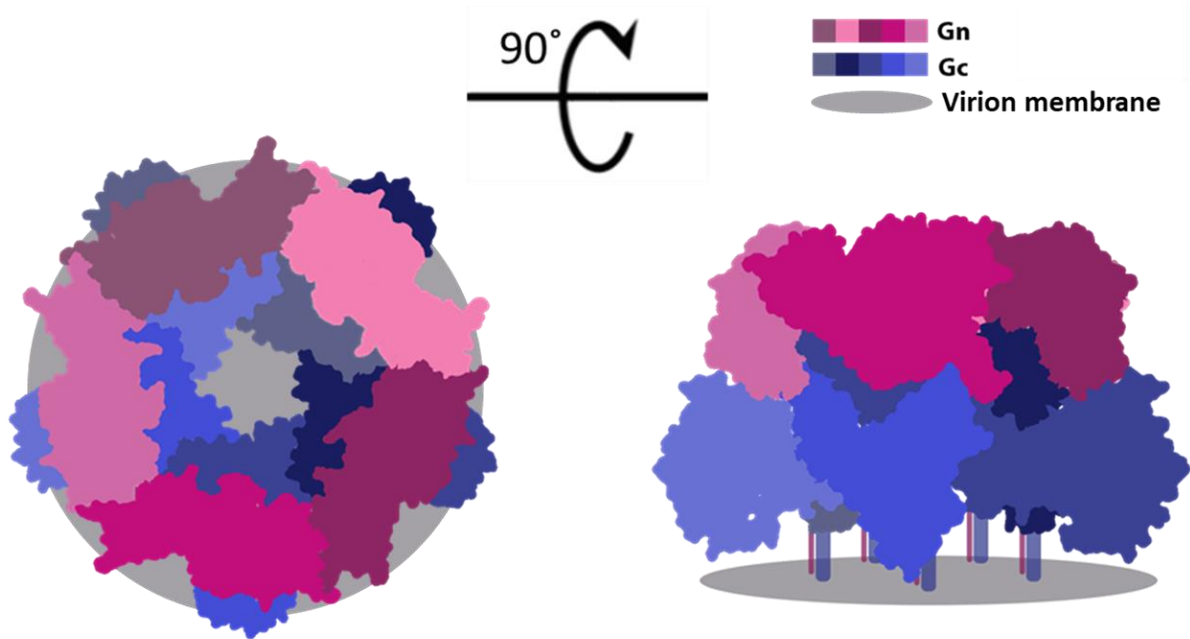

551

552 **Figure 5.** Top (left) and side views (right) of a schematic surface representation of the  
553 pentameric assembly of envelope-displayed RVFV Gn-Gc heterodimers based upon  
554 integrative cryoEM and X-ray crystallography (PDB ID: 6F9F)(Halldorsson et al., 2018b) are  
555 shown. Pentamers and hexamers of Gn-Gc heterodimers encapsulate RVFV with T=12  
556 icosahedral symmetry. Each membrane distally located RVFV Gn is rendered in a shade of  
557 purple and each membrane proximally located RVFV Gc is rendered in a shade of blue. The  
558 C-terminal regions of RVFV Gn and Gc are shown as lines due to the lack of high resolution  
559 structural information and are anchored to the virion membrane (grey).
